# Supplementary material
Source: publisher site journal article supplement (https://www.spandidos-publications.com/7902/downloadSupplementary)

Figure S1. Domain organization and predicted 3D structure of the RRBPI-ALK fusion protein. (A) Schematic of RRBPI-ALK domain architecture. The RRBPI portion contains a transmembrane region, ribosome receptor, RPT1 and coiled-coil/low-complexity segments; the ALK portion retained in the fusion comprises the TyrKc only. The dashed line denotes the fusion breakpoint. The sequence was retrieved from Ensembl (<https://www.ensembl.org/>, release 114) and its domain annotations were obtained from SMART (<http://smart.embl.de/>). (B) Predicted 3D model generated with AlphaFold server (<https://alphafoldserver.com/>). The blue-to-yellow gradient indicates the predicted local distance difference test confidence score (blue, high; yellow/orange, low). The model highlights extended  $\alpha$ -helical/coiled-coil elements from RRBPI adjacent to the globular ALK kinase domain, consistent with a structural basis for dimerization-driven kinase activation. RRBPI, ribosome-binding protein 1; TyrKc, tyrosine kinase catalytic domain; ALK, anaplastic lymphoma kinase; Rib\_recp\_KP\_reg, ribosome receptor lysine/proline rich region; RPT, internal repeats; MAM, meprin-A5-PTP $\mu$  domain; LDLA, low-density lipoprotein receptor domain class A.

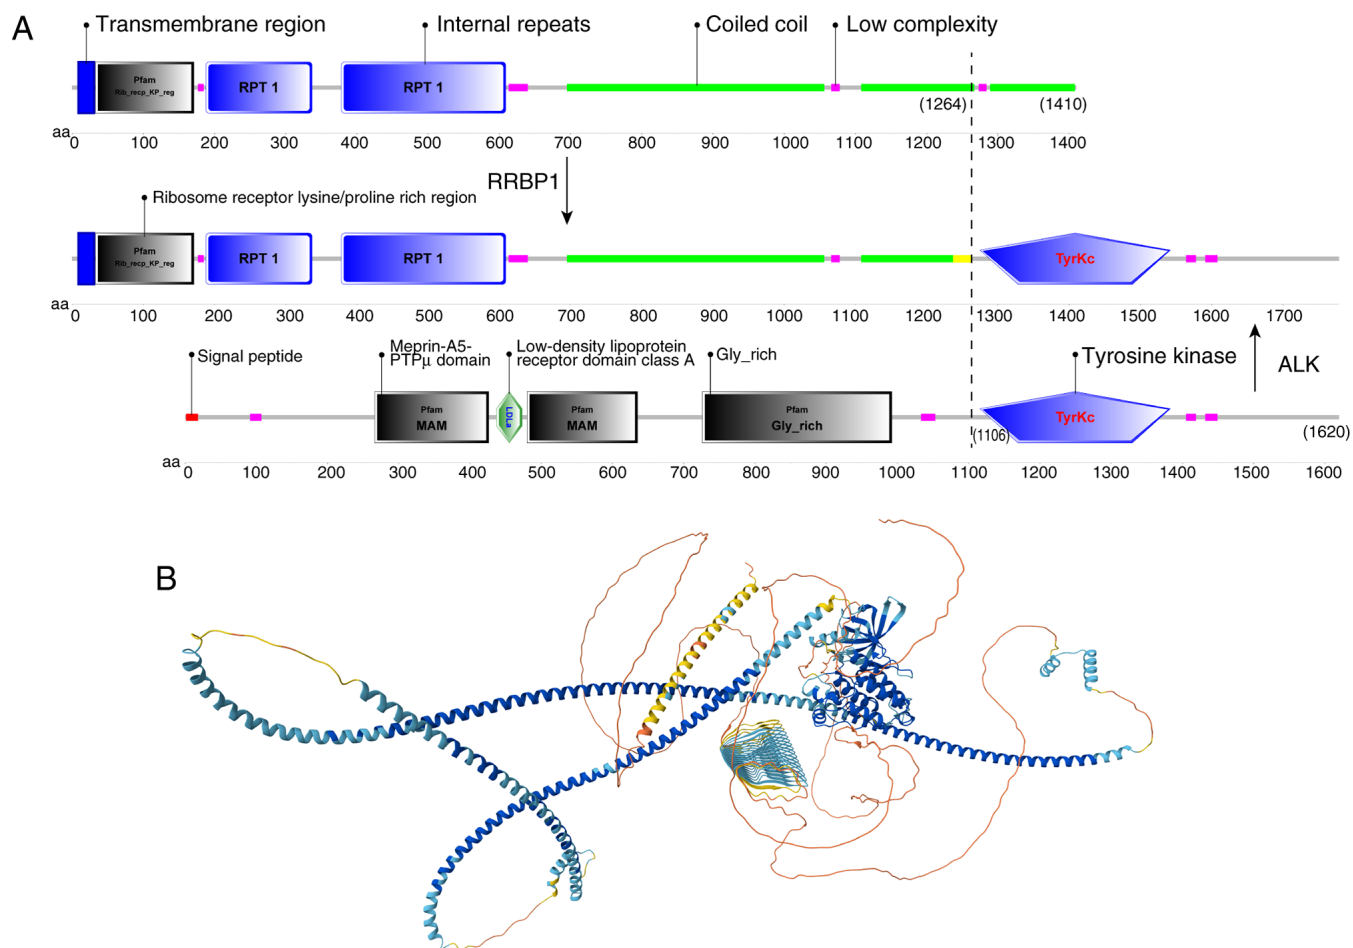

Supplement: Supplementary file [file downloadSupplementary]
